# Supplementary material for: eDiVA—Classification and prioritization of pathogenic variants for clinical diagnostics
Source: Hum Mutat. 2019 May 21;40(7):865–78. doi: 10.1002/humu.23772 (PMC6767450; doi:10.1002/humu.23772)
Supplement: Supplementary file 1 — Supporting information [file HUMU-40-865-s001.pdf]

# Supplemental Material

## 1Variant calling pipeline (eDiVA-Predict)

### 2Sample-wise analysis:

- 3 1. Read alignment with BWA mem, chimeric read filtering, and sorting by
- 4 chromosome and position
- 5 2. Local realignment with GATK RealignerTargetCreator and IndelRealigner
- 6 3. Duplicate marking with Picard Markduplicates
- 7 4. Base quality recalibration with GATK BaseRecalibrator
- 8 5. Variant calling with GATK HaplotypeCaller
- 9 6. Split SNV and INDELs to be processed independently
- 10 7. Quality control for SNVs and INDELs using GATK 3.3
- 11 8. Select high quality variants and generate final call file in VCF format
- 12 a. Filters to exclude SNPs with GATK VariantFiltration tool:
- 13 i. clusterWindowSize 10
- 14 ii. "MQ < 30.0 || QUAL < 25.0 "
- 15 iii. "DP < 5 || DP > 400 || GQ < 15
- 16 b. Filters to exclude Indels with GATK VariantFiltration tool:
- 17 i. QD < 2.0 || FS > 200.0 || ReadPosRankSum < -20\"
- 18 ii. "DP < 5 || DP > 400 || GQ < 15"

### 19Multi-Sample calling for families and trios:

- 20 1. Merge the individual variant call files to obtain all variant positions across the
- 21 family
- 22 2. Re-genotype all samples at all variant positions using GATK HaplotypeCaller
- 23 3. Annotate multi-sample VCF file using eDiVA-Annotate.
- 24

### **Comparison of pathogenicity classifiers on additional benchmark datasets:**

We compared eDiVA-Score on five datasets downloaded from

<http://structure.bmc.lu.se/VariBench/GrimmDatasets.php>

Composed of:

- Filtered subset of HumVar (Adzhubei et al., 2010).
- Filtered subset of ExoVar (Li et al., 2013).
- Filtered subset of VariBench (Nair and Vihinen, 2013).
- Filtered subset of predictSNP (Bendl et al., 2014).
- Filtered subset of SwissVar Dec. 2014 (Mottaz et al., 2010).

We calculated the ROC curve for each dataset independently, and for the joint set of the five datasets. These datasets have been commonly used in several benchmarks. They are composed of mostly rare, non-synonymous SNPs. Each dataset defines differently the criteria to assign a variant to the pathogenic or not-pathogenic class, thus providing benchmarking set with different rules than the one used for training. We observed that M-CAP and Revel perform substantially better than in the previously described benchmarks using ClinVar or HGMD variants (Supplemental Figure 2). From Suppl. Fig. 2, we observed how scores such as Revel and M-CAP achieve better ROC than eDiVA-Score. This is justified by the fact that such scores have been expressly developed for rare SNPs, thus are better suited to discern between pathogenic and neutral variants in these subsets.

25This result highlights the different fields of applicability of eDiVA-Score versus  
26Revel or M-CAP. The first is a general-purpose score to classify all variants, without  
27specific focus on rare nonsynonymous SNPs. Revel and M-CAP, instead focus on rare  
28variants with impact on the amino acid sequence. It is an expected consequence, then,  
29that Revel and M-CAP perform better on evaluation datasets close to the problem  
30they address, rather than ranking all variants.

### 31Exomiser benchmark parameters

- 32-       PhenIX prioritization mode
- 33-       Autosomal Recessive inheritance mode for compound heterozygous and  
34recessive homozygous variants
- 35-       Autosomal Dominant inheritance mode for dominant *de novo* variants
- 36-       No filter by allele frequency
- 37-       Keep only PASS values
- 38-       Variants sorted by decreasing value of the combined score (variant + gene)
- 39-       HPO terms: extracted from ClinVar annotation of the variants

40

### 41Imperfect HPO phenotype generation

42The algorithm we used to generate an imperfect HPO ID set, starting from the full  
43characterization in ClinVar is the following. We altered each list of disease-associated  
44HPO IDs by uniformly sampling between a set of alterations. Each HPO ID in the list  
45could be substituted with:

- 46 -   The same HPO ID [in this case no alteration]
- 47 -   One HPO ID among the ancestors of the current HPO ID [i.e. choosing a less  
48       specific HPO ID than the true one]

- 49 - One HPO ID among the descendants of the current HPO ID [i.e. choosing a
- 50 more specific HPO ID than the true one]
- 51 - One random HPO ID [something that could be unrelated to the disease]
- 52 - Nothing [in this case the HPO ID is removed]

### 53 Gene-HPO association estimation algorithm:

54 In order to estimate the correlation of a gene with the user-defined set of phenotypes  
55 (HPO-IDs) we adapted the Maximum Information Content Ancestor (MICA)  
56 algorithm from [1]. We extended the MICA algorithm to get a finer-grained  
57 evaluation of similarities/differences among nodes of two sub-trees of the graph. With  
58 the original MICA criterion, distance from node A to all nodes from a MICA sub-tree  
59 not containing node A is the same. In this way the farther a node (HPO ID) is in the  
60 graph, the less it is considered similar. This implementation returns similarity values  
61 between 0 and 1 against a fixed reference value, eliminating the need to rescale every  
62 time the algorithm is run using different terms as in [1], and making different runs  
63 directly comparable.

64 In brief, we first build a graph used for calculating Gene-HPO associations in three  
65 steps:

- 66 • Build a directed acyclic graph (DAG) of HPO terms based on the information  
67 from [2].
- 68 • Define the information content (IC) of each node  $t_i$  (i.e. HPO ID) as  
69  $IC(t_i) = -\log_2(f_{t_i})$ , where  $f_{t_i}$  is the frequency of  $t_i$ , or any of its descendants, in  
70 the gene-HPO associations from [3]. This way, specific HPO terms associated  
71 with few genes have higher IC than HPO terms associated to a large number of  
72 genes. Parental nodes typically have lower IC than their child nodes and the  
73 root node of the DAG has  $IC=0$ .

- 74 • All edges in the graph are weighted by  $E_{t_1, t_2} = \left| IC(t_1) - IC(t_2) \right| + 1000*$   
75

76 Next, we define the similarity between HPO terms as the shortest distance between  
77 their nodes  $(t_1, t_2)$ , passing through the MICA of the two nodes, rescaled by the  
78 maximum possible distance in the graph:

$$79 \quad S(t_1, t_2) = 1 - \left[ IC(t_1) + IC(t_2) - 2 \cdot IC(MICA(t_1, t_2)) \right] / (2 \cdot \max_{t \in DG} (IC))$$

80This formula ensures a similarity of 1 when the nodes are the same, and of 0 when  
 81two nodes are as far as possible in graph. This formula also enables assignment of  
 82different similarity values to all nodes descending from  $MICA(a, b)$ , with similarity  
 83decreasing when node  $b$  gets more specific.

84

85Finally, we estimate the association between a gene  $G$ , and a disease phenotype set  $D$ ,  
 86as:

$$87 \quad \text{sim}(Q \rightarrow D) = \text{avg} \left( \sum_{t_1 \in Q} \max_{t_2 \in D} S(t_1, t_2) \right)$$

88Where  $Q$  is the set of HPO terms associated to the gene  $G$ , extracted from [3].

89

90[1] Köhler, S., Schulz, M., Krawitz, P., Bauer, S., Dölken, S., Ott, C., Mundlos, C.,  
 91Horn, D., Mundlos, S. and Robinson, P. (2018). *Clinical Diagnostics in Human*  
 92*Genetics with Semantic Similarity Searches in Ontologies*. Am J Hum Genet. 2009  
 93Oct 9; 85(4): 457–464.

94[2] <http://purl.obolibrary.org/obo/hp.obo>

95[3] [http://compbio.charite.de/jenkins/job/hpo.annotations.monthly/lastStableBuild/](http://compbio.charite.de/jenkins/job/hpo.annotations.monthly/lastStableBuild/artifact/annotation/ALL_SOURCES_ALL_FREQUENCIES_genes_to_phenotype.txt)  
 96artifact/annotation/ALL\_SOURCES\_ALL\_FREQUENCIES\_genes\_to\_phenotype.txt

97

98\* The weight correction value 1000 was chosen to statistically ensure the passage  
 99through the MICA node when using an approximation (heuristic) algorithm for  
 100calculating the path between two nodes. In brief, we applied an optimized shortest-  
 101path algorithm, which needs to ignore the directionality of nodes to work properly,  
 102and does not guarantee the passing through MICA. We tested the passage of MICA  
 103empirically on 1'000'000 random node pairs. Using a weight correction value of 1000  
 104we always obtained the same path as expected by the exact algorithm, meaning that  
 105we expect a maximal error rate of 1e-6. Without the shortest-path algorithm, the  
 106computation time would increase approximately one thousand fold.

107

108

## Supplemental Figures

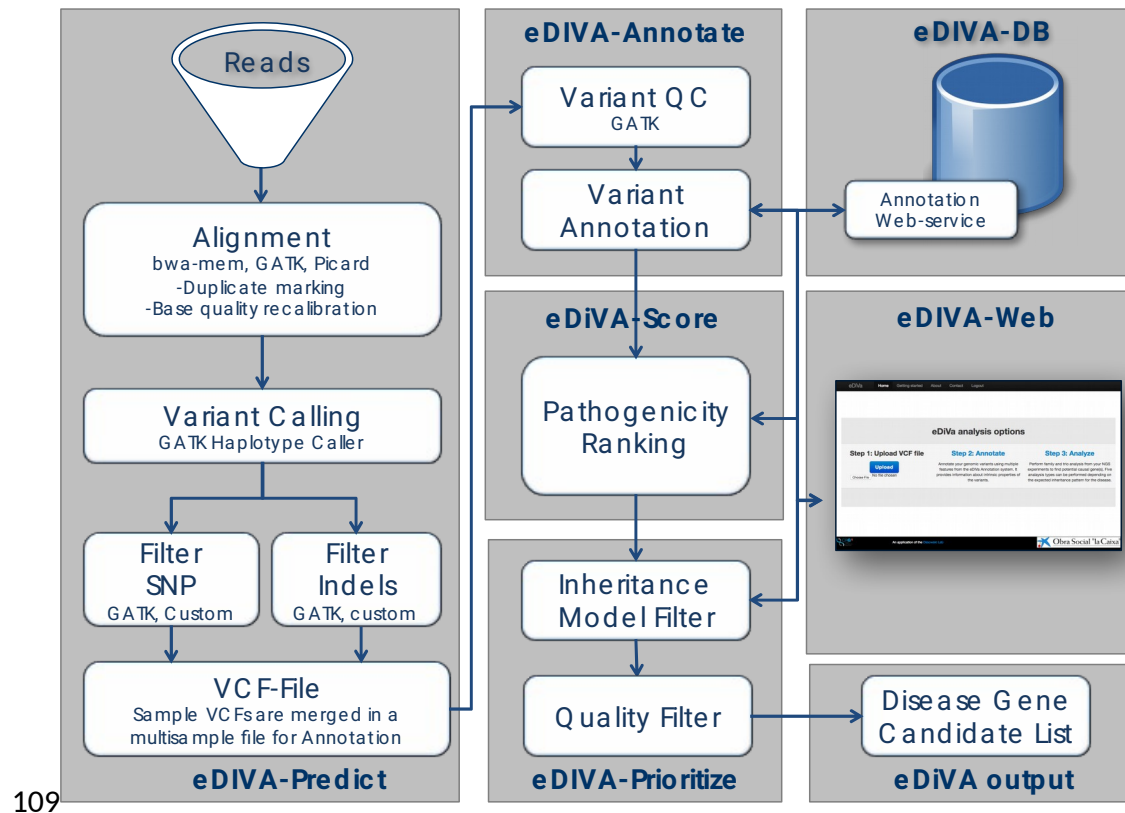

Supplemental Figure 1: eDiVa flowchart showing data processing from Fastq files to causal variant lists, including read alignment, variant calling, variant annotation, pathogenicity classification, causal variant prioritization, and output generation. eDiVa is available as stand-alone software or as a web service.

114

115

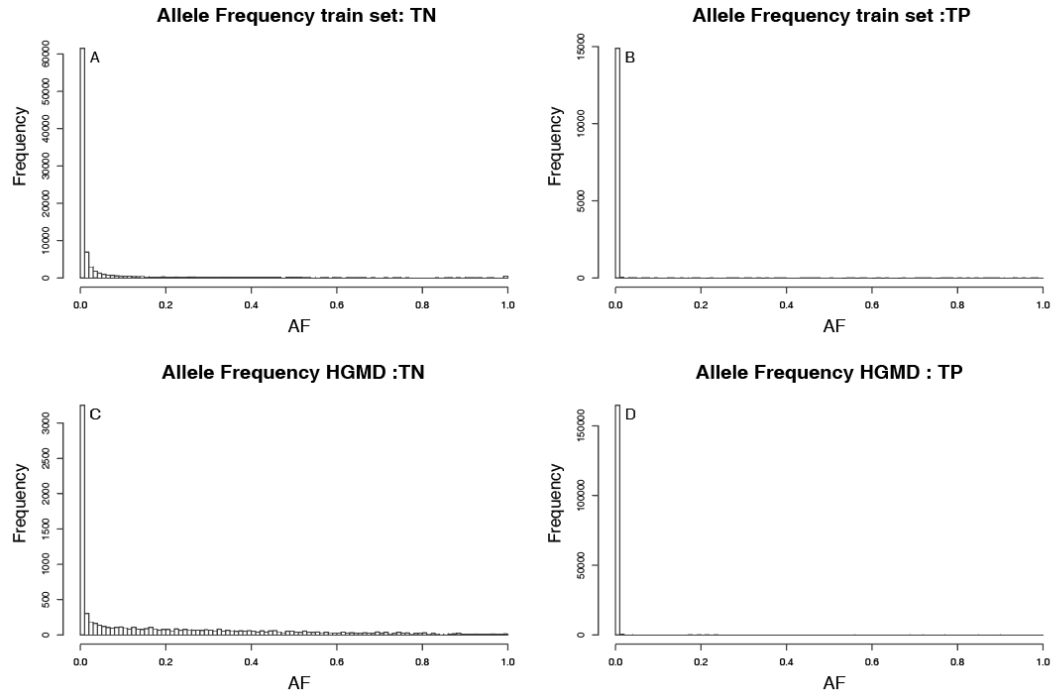

Supplemental Figure 2: Allele frequency distribution for variants used for training and benchmarking. A) AF of variants in (TN) negative training set (including ClinVar 'benign' and random GnomAD variants), B) AF of variants in (TP) positive training set (including ClinVar 'pathogenic' variants), C) AF of HGMD variants not labeled 'DM' or 'DM?', and D) AF of HGMD variants labeled 'DM' or 'DM?'.

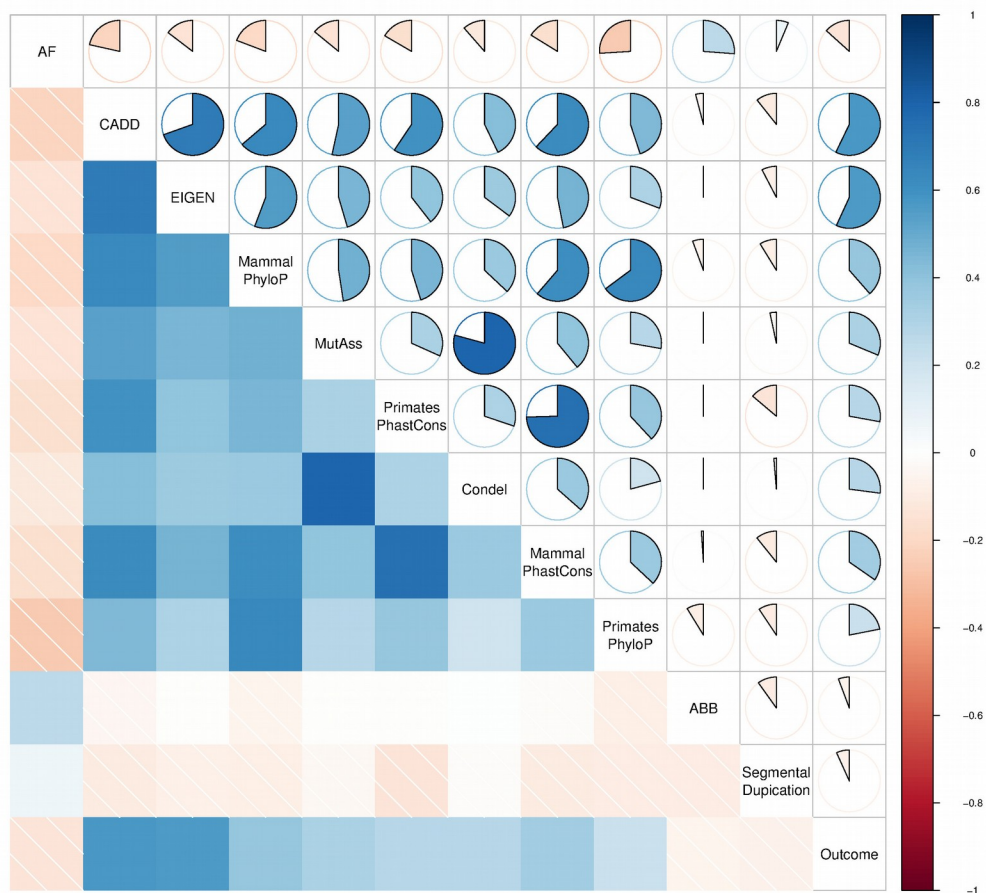

Supplemental Figure 3: Correlation matrix for features used to train the eDiVA-Score model with each other and with the outcome (correct labelling of TPs vs. TNs). Strong positive correlation is indicated by dark blue (and fraction of pie chart fill-in), while strong negative correlations are indicated by dark red (and fraction of pie chart fill-in). Strong positive correlation (although  $< 0.8$ ) is observed only for MutationAssessor and Condel, for PhastCons Primates and Mammals, as well as for PhastCons and PhyloP. As expected no strong negative correlation between features is found.

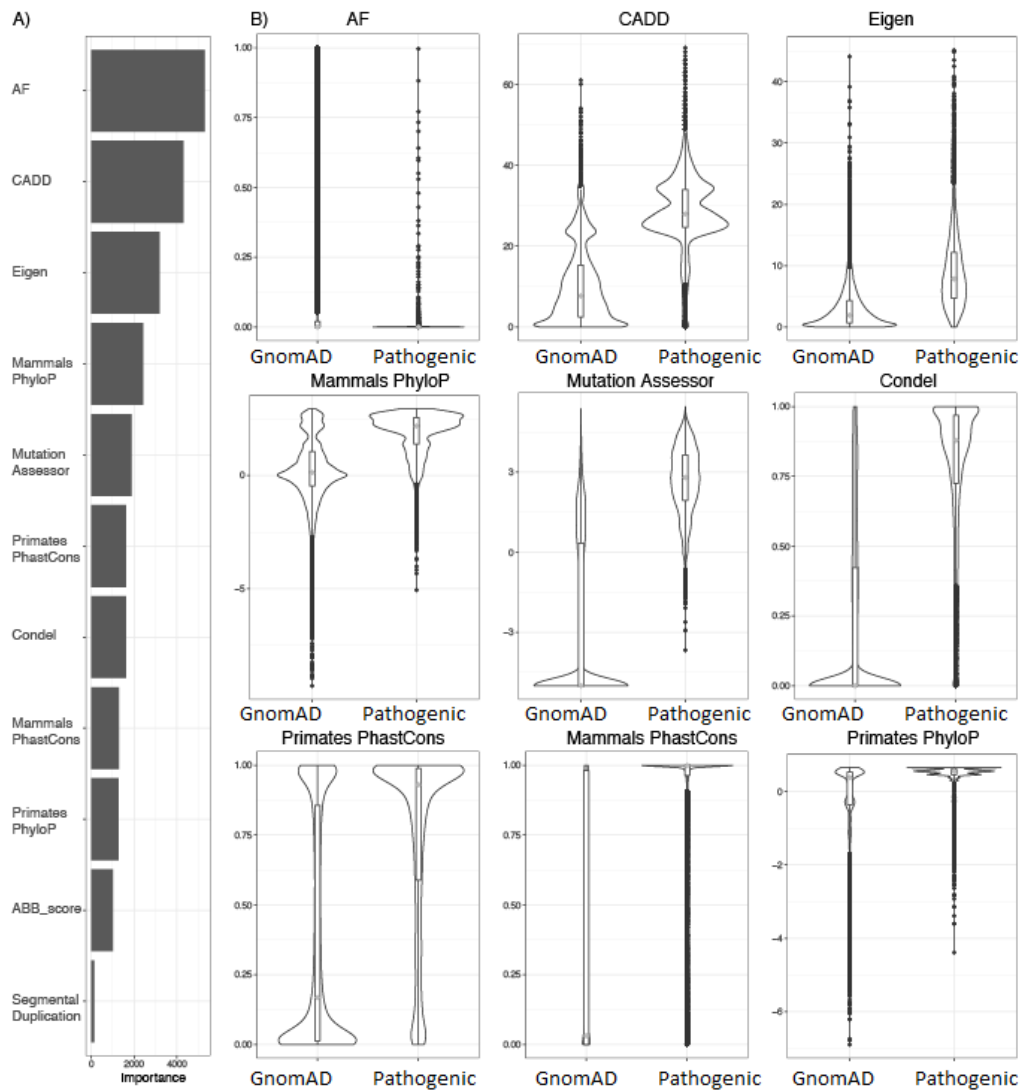

123

124Supplemental Figure 4: eDiVA-Score random forest model: A): estimated importance of features used  
 125in the model (extracted with varImp command), and B): distribution of values for top-9 features used  
 126in the model, comparing pathogenic variants from ClinVar against random GnomAD variants.

127

128

129

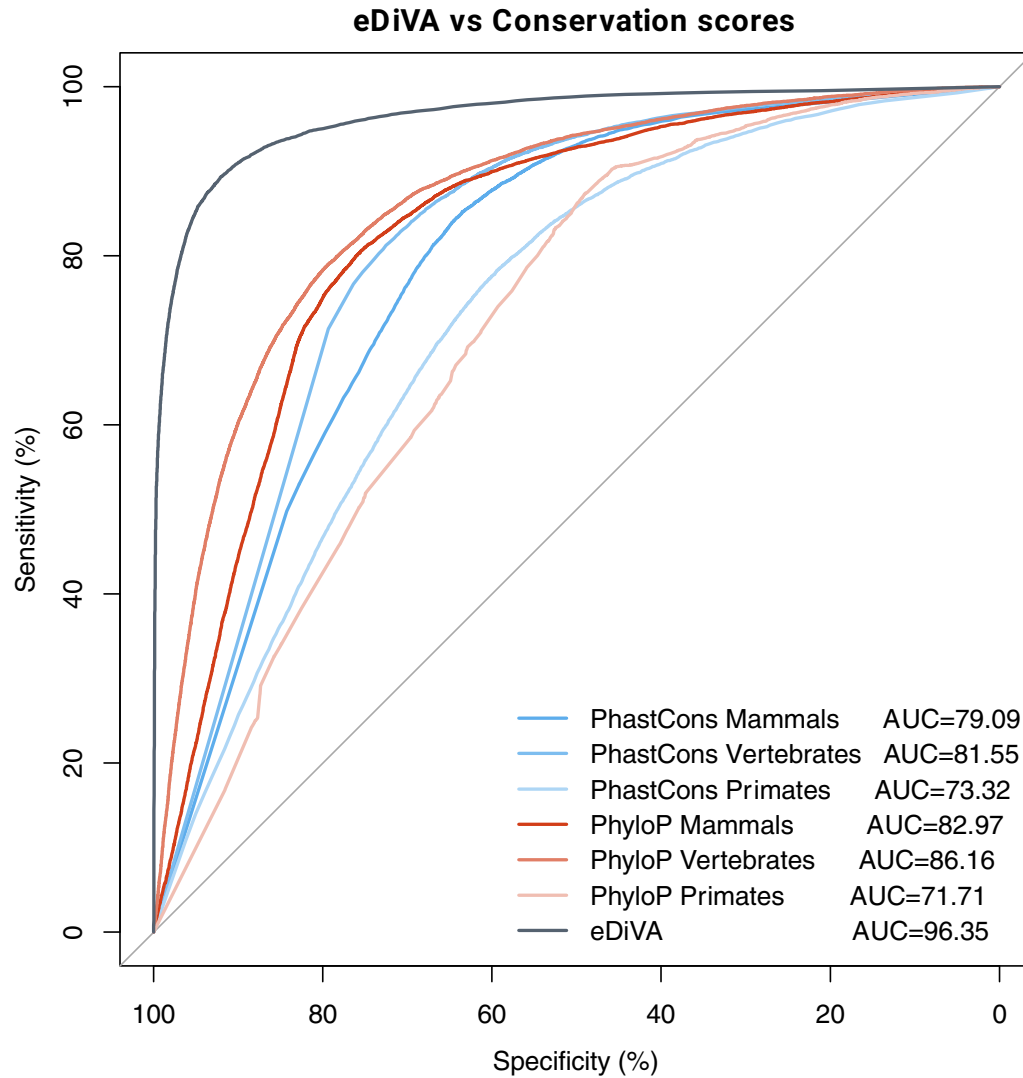

Supplemental Fig. 5 : ROC curve on independent variants from HGMD (DM and DM? as pathogenic) and 100k variants from GnomAD as benign comparing eDiVA-Score against all six conservation scores annotated by eDiVA. We found that conservation itself is a good predictor, but integration of different sources of information leads to substantially improved results.

135  
136

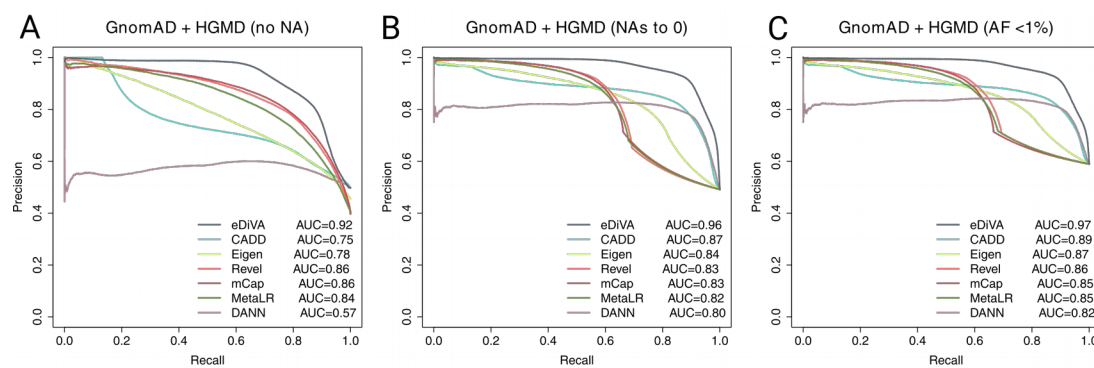

Supplemental Figure 6: Benchmarking of pathogenicity classifiers, Precision-Recall curves on A) set of 63,712 variants from HGMD (TP) and 100,000 from GnomAD (TN) where all tools provided a prediction value B) set of 96,569 variants from HGMD (TP) and 100,000 from GnomAD (TN) after setting missing prediction values to 0, C) subset of rare variants (AF < 1%) from set B.

141

142.

143

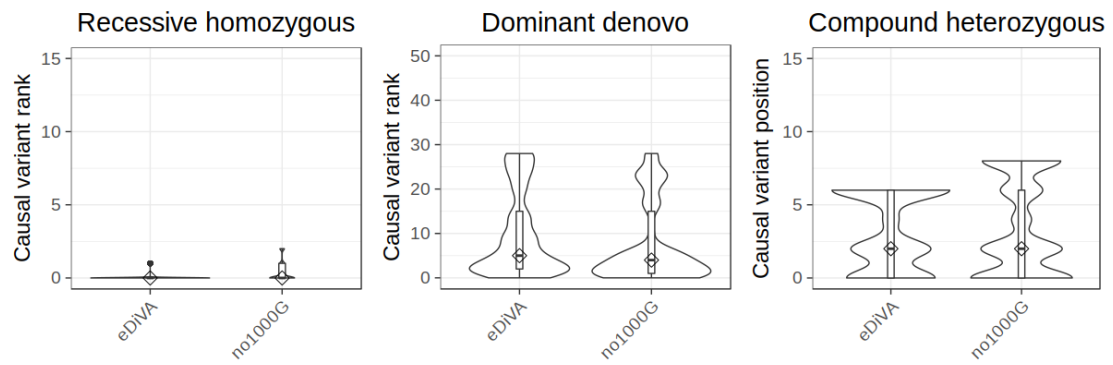

144

145

146Supplemental Figure 7: Violin plot of the trio-simulations to evaluate the impact of 1000GP  
 147information on eDiVA results. The rank distribution is only mildly affected by the lack of population  
 148AF information from 1000Genomes, demonstrating that the eDiVA model is not overfitted to AF  
 149information from 1000GP.

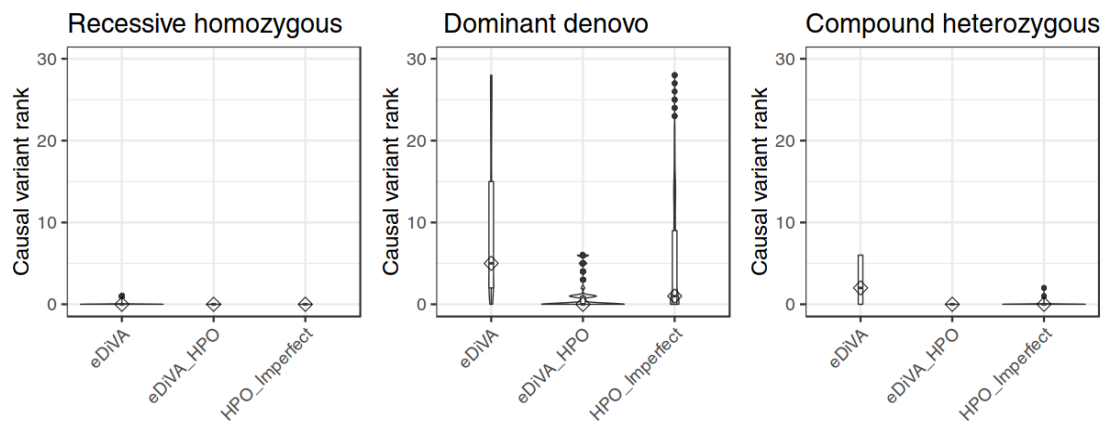

151

152Supplemental Figure 8 : Violin plot of the trio-simulations to evaluate the impact of incomplete and  
 153imperfect phenotyping (HPO term annotation) on eDiVA's performance. We altered the complete set of  
 154HPO IDs of a gene obtained from ClinVar by randomly choosing for each HPO ID among the options  
 155i/ keep HPO ID, ii/ remove HPO ID, iii/ choose a random HPO ID, iv/ choose a random ancestor in  
 156the HPO ontology, v/ choose a random descendant in the HPO ontology. We compared the  
 157performances of eDiVA without HPO annotation (**eDiVA**), eDiVA with complete HPO annotation,  
 158(**eDiVA\_HPO**) and eDiVA with incomplete/imperfect HPO annotation (**HPO\_imperfect**). We found  
 159that an incomplete HPO description negatively affects the ranking of causal genes, but is still superior  
 160to prioritization without phenotypic information.

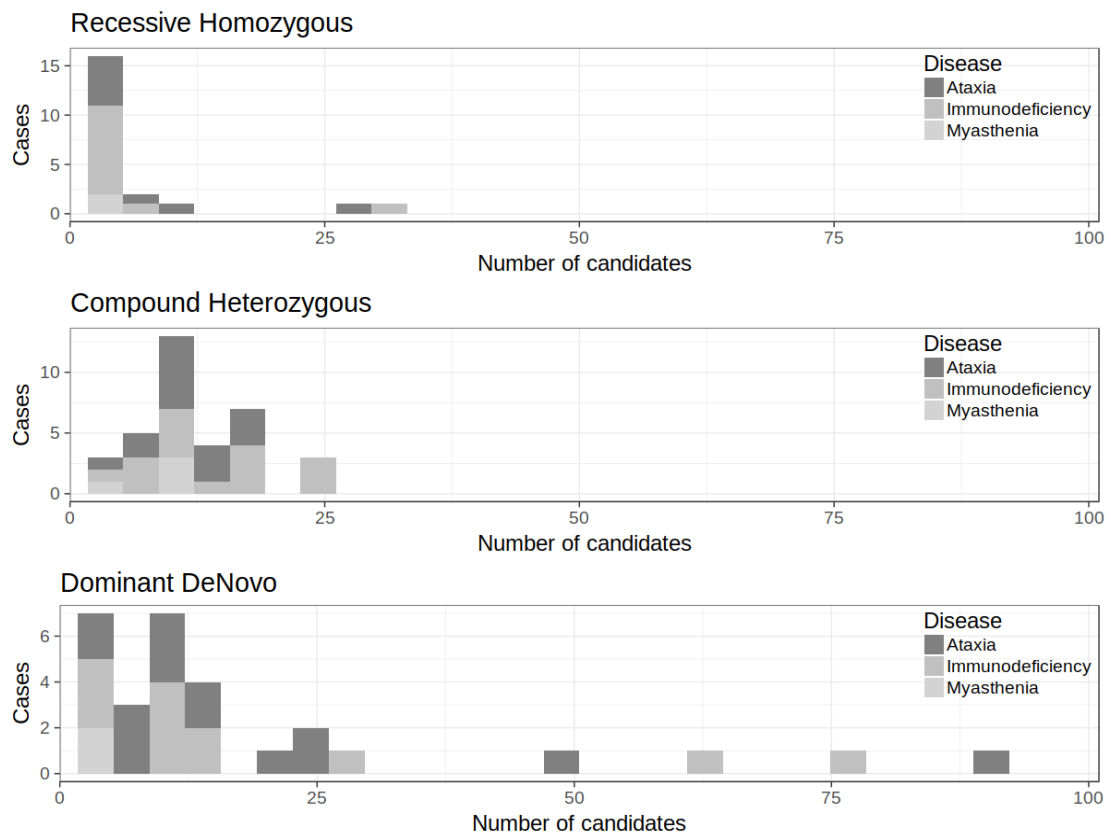

Supplemental Figure 9: Distribution of the number of candidate genes reported by eDiVA for 35 parent-child trios affected by rare diseases. Results are plotted separately by inheritance type and colored by the studied disease (i.e. Ataxia, Immunodeficiency, Myasthenia). In more than 90% of the cases eDiVA reports less than 30 candidate variants. For recessive homozygous and dominant de novo inheritance only one to five candidates are reported in the majority of cases. Outliers in dominant de novo inheritance mode are typically caused by low quality or low coverage WES data for one of the parents.

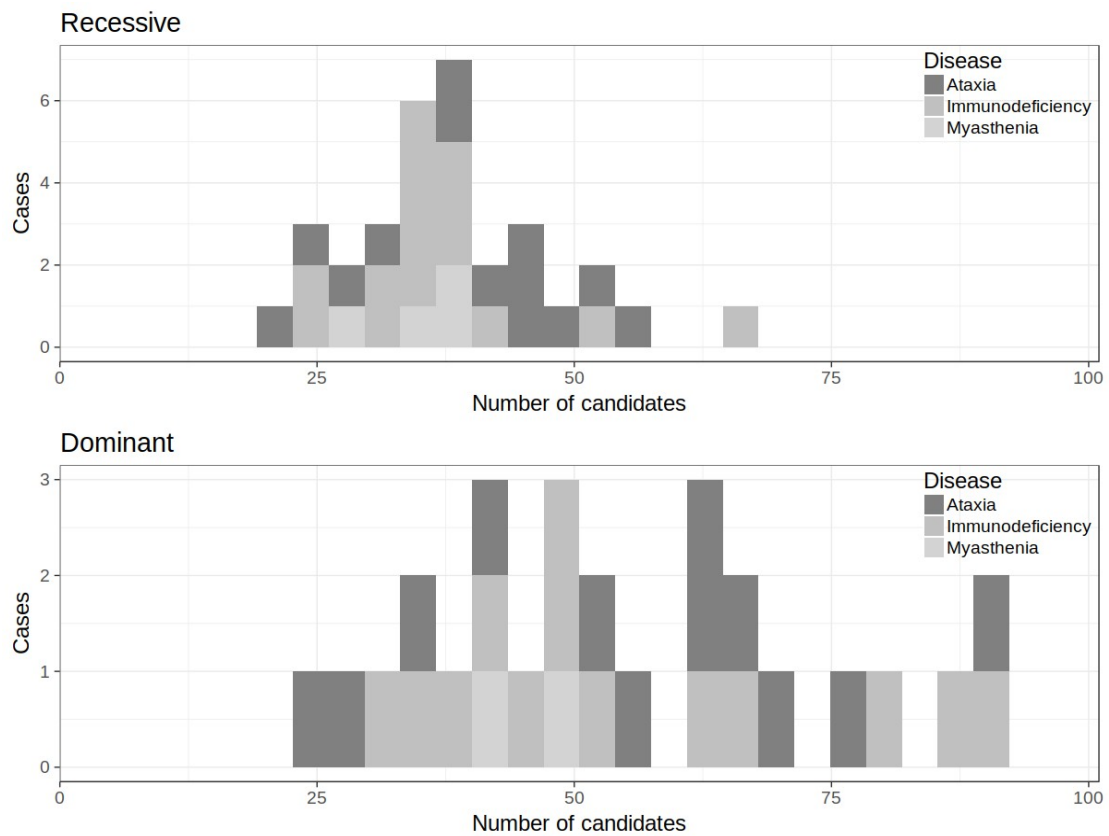

Supplemental Figure 10: Distribution of the number of candidate variants reported by Phen-Gen for 16235 parent-child trios affected by rare diseases. Results are plotted separately by inheritance type and colored by the studied disease (i.e. Ataxia, Immunodeficiency, Myasthenia). Phen-Gen reports a median of 36 candidate genes for recessive and a median of 52 candidate genes for dominant inheritance modes.

Supplemental Tables

168Supplemental Table 1: Default variant filter parameters of eDiVA used for WES analysis. Parameters  
169for inheritance modes supported for parent-child trios differ in maximum population AF threshold, the  
170zygosity requirements for each sample, and the minimum CADD score.

| Filter                                           | Recessive homozygous |     |     | Dominant de novo |     |     | Compound heterozygous |     |     |
|--------------------------------------------------|----------------------|-----|-----|------------------|-----|-----|-----------------------|-----|-----|
| Maximum variant frequency in healthy population  | 3%                   |     |     | 1%               |     |     | 2%                    |     |     |
| Exonic or splicing function                      | X                    |     |     | X                |     |     | X                     |     |     |
| Exclude if synonymous SNV                        | X                    |     |     | X                |     |     | X                     |     |     |
| Exclude if unknown amino acid change             | X                    |     |     | X                |     |     | X                     |     |     |
| Exclude if segmental duplication > 0             | X                    |     |     | X                |     |     | X                     |     |     |
| CADD                                             | >=0                  |     |     | >19              |     |     | >=0                   |     |     |
| Zygosity requirements<br>Child   Parent   Parent | 1/1                  | 0/1 | 0/1 | 0/1              | 0/0 | 0/0 | 0/1                   | 0/0 | 0/1 |
|                                                  |                      |     |     |                  |     |     | 0/1                   | 0/1 | 0/0 |

*Supplemental Table 2: Number of semisynthetic cases per inheritance type simulated for benchmarking of disease variant prioritization methods. Pathogenic variants obtained from ClinVar have been integrated in WES data of a parent child trio (CEPH family from Coriell) to obtain a total of 6811 cases for which phenotypic information was available in form of HPO terms. Genotypes for each inheritance mode are shown.*

| Inheritance                        | Number of cases | Simulated genotypes |            |            |
|------------------------------------|-----------------|---------------------|------------|------------|
|                                    |                 | NA21891             | NA12892    | NA12878    |
| Homozygous recessive               | 3353            | 0/1                 | 0/1        | 1/1        |
| Dominant de-novo                   | 2592            | 0/0                 | 0/0        | 0/1        |
| Compound heterozygous <sup>1</sup> | 866             | 0/1<br>0/0          | 0/0<br>0/1 | 0/1<br>0/1 |

---

<sup>1</sup> Each compound pair is composed of two variants located in the same gene with a distance greater than three base pairs.

## Getting started using the eDiVA platform:

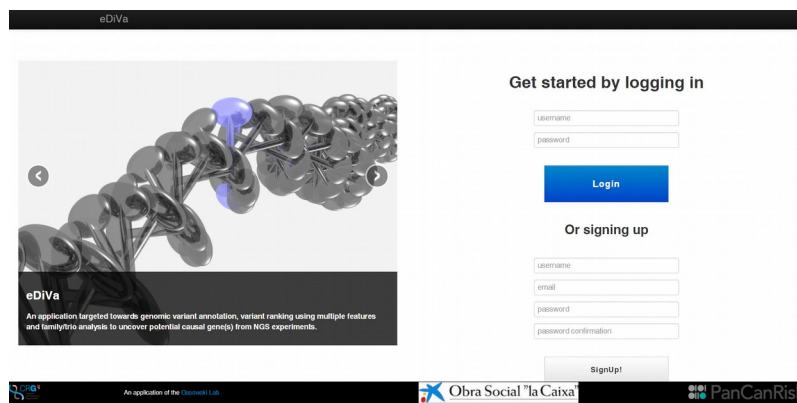

To create a login, please specify a valid email address and choose a user name and password. The account will be active immediately after signup and can be used to login to eDiVA. Alternatively, a guest user is available for testing purposes. Data in the guest user workspace may be deleted without warning. The guest account is not intended for performing analysis on access-restricted data, as any other user can access the results.

### Guest account:

username: guest

password: ediva\_test

## **200eDiVA Analysis.**

201

202eDiVA's causal variant analysis consists of three steps:

203 1) Uploading the variant file in VCF format,

204 2) Functional annotation of the variants and ranking by eDiVA's pathogenicity score

205 3) Prioritization using segregation and clinical information (phenotypes).

eDiVa
Home
Getting started
Account: mbosio
Logout
About
EULA
Contact

### eDiVa analysis options

#### Step 1: Upload VCF file

No file chosen

OR

#### Step 2: Annotate

Annotate genomic variants using eDiVa's disease knowledge database. Ranks variants using eDiVa's pathogenicity classifier.

Select a vcf file to annotate from your workspace:

ediva\_demo\_data.vcf

▼

#### Step 3: Prioritize

Prioritize causal variants in single cases, parent-child trios or families.

Select the ranked file to process:

▼

### Workspace

|                     |          |        |
|---------------------|----------|--------|
| ediva_demo_data.vcf | Download | Delete |
| family.txt          | Download | Delete |

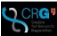
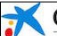
Obra Social "la Caixa"
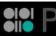
PanCanRisk

206After logging into eDiVa, start with uploading the VCF file containing variants for a  
 207single case, a parent-child trio or a larger family. Trio and family variants need to be  
 208provided as multi-sample VCF file. The uploaded files will appear in the workspace  
 209section, which occupies the lower half of the browser page. The workspace will also  
 210contain all result files generated by eDiVa.

211Second, select the VCF file in drop down menu of the Step 2: Annotate section and  
 212press the Run button. The annotation step will require a few minutes to compute and  
 213an email is sent once the step is finished. You can also press the reload button of the  
 214browser after a few minutes and the annotated variant file should appear in the  
 215workspace section.

216 Third, select the annotated variant file in the drop down menu of the Step 3: Prioritize  
 217 section and press the Submit button. Pressing the Submit button of Step 3 will load a  
 218 new page for causal variant prioritization analysis.

eDiVa
Home
Getting started
Account: mbosio
Logout
I
About
EULA
Contact

### Causal Variant Prioritization

eDiVa's causal variant prioritization identifies candidate variants based on eDiVa's pathogenicity score, in-silico disease gene panels generated according to the provided HPO phenotype terms and the correct segregation according to the following inheritance models:

- Autosomal dominant de novo
- Autosomal dominant inherited
- Autosomal recessive homozygous
- Autosomal compound heterozygous (only for trios)
- X-linked

Selecting the option "All" will generate results for all 5 inheritance modes presented in separate sheets of one Excel file.

**Analysis Options**

|                              |                            |
|------------------------------|----------------------------|
| Input File:                  | ediva_demo_data.ranked.csv |
| Disease inheritance pattern: | dominant_denovo            |
| Segregation analysis in:     | trio                       |

**Sample information**

| Sample ID | Affected ?               |
|-----------|--------------------------|
| NA12878   | <input type="checkbox"/> |
| NA12891   | <input type="checkbox"/> |
| NA12892   | <input type="checkbox"/> |

**Disease Phenotypes**

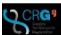
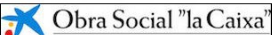
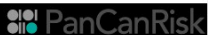

219 Here, select the inheritance type for your experiment, or select 'all' for running all  
 220 possible analyses in one go. The following inheritance modes are supported:

- 221 • Dominant\_denovo
- 222 • Dominant\_inherited
- 223 • Recessive
- 224 • Xlinked
- 225 • Compound

226Second, select the type of segregation analysis (single case, trio or family) and select  
227the samples that are affected by the disease. Finally, please use the text box to specify  
228the disease phenotypes in form of HPO terms (one HPO ID per line). Follow the link  
229next to the text box to use the HPO term search interface to obtain suitable HPO  
230terms.

231Finally, genes can be excluded from causal variant prioritization by selecting the  
232predefined blacklist containing genes frequently appearing as false positives (i.e.  
233genes that appeared as incidental findings in many studies of different diseases). In  
234addition a custom blacklist of genes can be defined, which will also be excluded.  
235Press the submit button to start the analysis. This will bring the user back to eDiVA's  
236workspace page, where the result file of the prioritization will be found after a few  
237minutes of computation. An email is sent to the user once the computation has been  
238finished.

239The analysis results will appear in the workspace as a .zip file containing all  
240processed data. The main result file is "variant\_prioritization\_report.xlsx" which is an  
241excel spreadsheet containing all candidate variants organized by inheritance type (e.g.  
242one sheet per inheritance type). The zipped file also contains the intermediate analysis  
243files in csv format containing unfiltered annotated variants, which are useful in case  
244no suitable candidate gene is found in the excel file. For each inheritance type there  
245are two main files and a result log file:

246 - filtered .{inheritance}.csv : containing the candidate variants for  
247 {inheritance}  
248 - unfiltered.{inheritance}.csv: containing all annotated variants, specifying for  
249 each variant the reason for being excluded or included, the HPO relatedness  
250 score, and the final ranking (i.e. columns: inheritance, filtered,  
251 HPO\_relatedness, final rank columns).

252

253 - .job.log : containing the execution log file for the prioritization process.

254

255

## 256Example case

257eDiVA comes with an example case for quickly testing the tool with a few clicks. On  
258the homepage please click the button “Load test data” to populate your workspace  
259with a multi-sample VCF file.

260Next, please follow the instructions for variant annotation (step 2) and variant  
261prioritization (step 3) as described above.

262In order to test the prioritization algorithm, we used a healthy trio (CEPH) and spiked  
263in causal disease mutations from ClinVar for three inheritance types: recessive  
264homozygous (Biotinidase deficiency), dominant de novo, (Pallister-Hall syndrome),  
265and compound heterozygous (Familial hypokalemia-hypomagnesemia). In step 3  
266(prioritization) please use the following subset of the ClinVar reported HPO terms for  
267the respective disease and inheritance types you wish to test:

268- Recessive homozygous: HP:0000407, HP:0000572, HP:0000648, HP:0001051,  
269HP:0001250, HP:0001251, HP:0001252, HP:0001263, HP:0001987, HP:0002014,  
270HP:0002240, HP:0002506, HP:0008872

271- Dominant de novo: HP:0000028, HP:0000110, HP:0001360, HP:0001511,  
272HP:0004322, HP:0012165

273- Compound heterozygous: HP:0000128, HP:0000848, HP:0000934, HP:0001250,  
274HP:0002027, HP:0002900, HP:0002917, HP:0003127, HP:0003324, HP:0003470,  
275HP:0005567

276

277For each inheritance type you can run the prioritization analysis as explained before,  
278specifying NA12878 as affected and NA12891 and NA 12892 as unaffected. Please  
279include the relevant HPO terms in the text field (one HPO ID per line) to run the  
280analysis.

281
